1        **Whole genome sequencing of orofacial cleft trios from the Gabriella Miller Kids First**  
2        **Pediatric Research Consortium identifies a new locus on chromosome 21**

3  
4        Nandita Mukhopadhyay<sup>1</sup>, Madison Bishop<sup>2</sup>, Michael Mortillo<sup>3</sup>, Pankaj Chopra<sup>2</sup>, Jacqueline B.  
5        Hetmanski<sup>4</sup>, Margaret A. Taub<sup>5</sup>, Lina M. Moreno<sup>6</sup>, Luz Consuelo Valencia-Ramirez<sup>7</sup>, Claudia  
6        Restrepo<sup>7</sup>, George L. Wehby<sup>8</sup>, Jacqueline T. Hecht<sup>9</sup>, Frederic Deleyiannis<sup>10</sup>, Azeez Butali<sup>11</sup>, Seth  
7        M. Weinberg<sup>1,12</sup>, Terri H. Beaty<sup>4</sup>, Jeffrey C. Murray<sup>13</sup>, Elizabeth J. Leslie<sup>2,§</sup>, Eleanor  
8        Feingold<sup>1,12,14,§</sup>, Mary L. Marazita<sup>1,12,15,§</sup> \*

- 9  
10        1. Center for Craniofacial and Dental Genetics, Department of Oral Biology, School of  
11        Dental Medicine, University of Pittsburgh, Pittsburgh PA, 15219, USA  
12        2. Department of Human Genetics, School of Medicine, Emory University, Atlanta, GA,  
13        30322, USA  
14        3. Department of Epidemiology, Rollins School of Public Health, Emory University,  
15        Atlanta, GA, 30322, USA  
16        4. Department of Epidemiology, Bloomberg School of Public Health, Johns Hopkins  
17        University, Baltimore, MD, 21205, USA  
18        5. Department of Biostatistics, Bloomberg School of Public Health, Johns Hopkins  
19        University, Baltimore MD, 21205, USA  
20        6. Department of Orthodontics, College of Dentistry, University of Iowa, Iowa City, IA,  
21        52242, USA  
22        7. Fundación Clínica Noel (<http://www.clinicanoel.org.co/>), Medellin, Colombia  
23        8. Department of Health Management and Policy, College of Public Health, University of  
24        Iowa, Iowa City, IA, 52242, USA  
25        9. Department of Pediatrics, McGovern Medical School and School of Dentistry, UT Health  
26        at Houston, Houston, TX, 77030, USA  
27        10. UC Health Plastic and Reconstructive Surgery, Colorado Springs, CO, 80907. USA  
28        11. Iowa Institute of Oral Health Research, College of Dentistry, University of Iowa, Iowa  
29        City, IA, 52242, USA

- 30 12. Department of Human Genetics, Graduate School of Public Health, University of  
31 Pittsburgh, Pittsburgh, PA, 15219, USA
- 32 13. Department of Pediatrics, Carver College of Medicine, University of Iowa, Iowa City,  
33 Iowa, 52242, USA
- 34 14. Department of Biostatistics Graduate School of Public Health, University of Pittsburgh,  
35 Pittsburgh, PA, 15261, USA
- 36 15. Clinical and Translational Science Institute, and Department of Psychiatry, School of  
37 Medicine, University of Pittsburgh, Pittsburgh, PA, 15262, USA

38 § Co-Senior Authors

39

40 \* CORRESPONDING AUTHOR:

41 Mary L. Marazita, PhD.

42 Center for Craniofacial and Dental Genetics

43 Bridgeside Point Suite 500

44 100 Technology Dr.

45 Pittsburgh, PA 15219

46 phone: 412-648-8380

47 FAX: 412-648-8387

48 Email: [marazita@pitt.edu](mailto:marazita@pitt.edu)

49

50

51 **Abstract**

52 Orofacial clefts (OFCs) are one of the most common birth defects worldwide and create a  
53 significant health burden. The majority of OFCs are non-syndromic, and the genetic component  
54 has been only partially determined. Here, we analyze whole genome sequence (WGS) data for  
55 association with risk of OFCs in European and Colombian families selected from a multicenter  
56 family-based OFC study. Part of the Gabriella Miller Kids First Pediatric Research Program, this  
57 is the first large-scale WGS study of OFC in parent-offspring trios. WGS provides deeper and  
58 more specific genetic data than currently available using imputation on single nucleotide  
59 polymorphic (SNP) marker panels. Here, association analysis of genome-wide single nucleotide  
60 variants (SNV) and short insertions and deletions (indels) identified a new locus on chromosome  
61 21 in Colombian families, within a region known to be expressed during craniofacial  
62 development. This study reinforces the ancestry differences seen in the genetic etiology of OFCs,  
63 and the need for larger samples when for studying OFCs and other birth defects in admixed  
64 populations.

65 **Introduction**

66 Orofacial clefts, primarily cleft lip (CL) and cleft palate (CP) are among the most common  
67 birth defects in all populations worldwide with differences in birth prevalence by ancestry (1, 2).  
68 Surgical treatment along with ongoing orthodontia, speech and other therapies, are very  
69 successful in ameliorating the physical health effects of OFC, but there is still a significant  
70 social, emotional and financial burden for individuals with OFC, their families, and society (3,  
71 4). Furthermore, there are disparities in access to such therapies for OFCs (5), similar to other  
72 malformations with complex medical and surgical needs. Some studies have suggested a  
73 reduced quality of life for individuals with OFCs (6), while other studies have identified higher

74 risk to certain types of cancers (7-9). Thus, it is critical to identify etiologic factors leading to  
75 OFCs to improve diagnostics, treatments, and outcomes.

76 The causal genes for most syndromic forms of OFCs are now known, and listed within  
77 OMIM (<https://www.ncbi.nlm.nih.gov/omim>, search criterion=(cleft lip cleft palate syndrome)  
78 AND "omim snp"[Filter]), but the majority of OFC cases - including about 70% of CL with or  
79 without CP (CL/P) and 50% of CP alone - are considered non-syndromic, i.e. they occur as  
80 isolated anomalies with no other apparent cognitive or structural abnormalities (1). The causal  
81 genes for non-syndromic OFCs are still largely undiscovered. To date, there have been 52  
82 genome-wide associations reported and replicated between non-syndromic CL/P and genetic  
83 markers (NHGRI-EBI Catalog of published genome studies) (10), but as for most other complex  
84 human traits (11-13), very few putative functional variants for non-syndromic OFCs have been  
85 identified from genome-wide association studies (GWASs)(14). In particular, the high  
86 heritability for OFC, estimated at 90% by a twin study in a Danish sample (15) cannot be  
87 explained by all identified common variants significantly associated with OFC, sometimes  
88 referred to as the “missing heritability” problem (16). Additional approaches will be necessary to  
89 expand our understanding of genetic variation in nonsyndromic OFCs and whole genome  
90 sequencing (WGS) holds the promise of teasing out the so-called missing heritability from  
91 GWASs of OFC and other complex traits (17).

92 An important new approach has been implemented by the Gabriella Miller Kids First  
93 Pediatric Research Consortium (<https://commonfund.nih.gov/kidsfirst/overview>). Kids First was  
94 established in 2015 to address gaps in our understanding of the genetic etiologies of structural  
95 birth defects and pediatric cancers by providing WGS of case-parent trios with these major  
96 pediatric conditions. Addressing both of these areas (structural birth defects and pediatric

97 cancers) in Kids First was partially motivated by the observation that children with birth defects  
98 such as OFCs are at a higher risk of also developing some cancers, and their family members  
99 also have elevated risk (7, 8), suggesting there may be shared genetic pathways underlying  
100 cancer and birth defects. The KidsFirst study consists of 952 case-parent trios (i.e. affected  
101 probands and their parents) from multiple OFC studies, of which, 415 are of European descent,  
102 275 Latino, 125 Asian and 137 African. The current study summarizes initial findings on  
103 common variants, i.e. single nucleotide polymorphic (SNP) markers and small  
104 insertions/deletions from WGS of a sample of 315 trios European descent, as well as a sample of  
105 265 trios of Latin American ancestry from Colombia, all with offspring affected with cleft lip  
106 with or without cleft palate (CL/P).

## 107 **Results**

### 108 Genome-wide association of SNPs and indels

109 Genome-wide associations using allelic and genotypic transmission disequilibrium test  
110 (TDT) were run separately in 315 **European** and 265 **Colombian** trios and then in the  
111 **Combined** set of all 580 trios on bi-allelic single nucleotide polymorphic (SNP) markers and  
112 indels with minor allele frequency (MAF) greater than 10% (see Methods for discussion of the  
113 MAF cutoff). A comparison of the p-values between allelic TDT (aTDT) and genotypic TDT  
114 (gTDT) showed high concordance (see section "Comparison between aTDT and gTDT" and  
115 supplementary figure S1 Figure 1), therefore, only the aTDT results are discussed in the  
116 following sections. P-values calculated using the exact binomial distribution from McNemar's  
117 test are reported for the aTDT.

118 Tables 1 and 2 show the most significant results in the **European** (Table 1) and **Colombian**  
119 trios (Table 2). Several SNPs gave genome-wide significant association p-values in the stratified

120 aTDT analysis of **European** (Table 1 and Figure 1 top panel) and **Colombian** trios (Table 2 and  
121 Figure 1 middle panel), and a single SNP achieved genome-wide significance in the **Combined**  
122 sample (Figure 1 bottom panel). In the **European** sample, 17 significant associations are  
123 observed across multiple chromosomes (Table 1). In the **Colombian** sample, four significant  
124 associations are observed for markers on chromosomes 6, 8, 19 and 21. After close examination  
125 of the genome-wide significant associations in the **European** and **Colombian** trios, the one  
126 strongly supported new result was a region on chromosome 21q22.3, discussed below. In the  
127 **Combined** aTDT, a single genome-wide significant association ( $p = 9.35E-14$ , OR = 2.13, 95%  
128 CI = [1.74–2.62], SNP rs72728755) was observed in the 8q24.21 chromosomal region. Many of  
129 the other associations showed properties that reduced our confidence in their reliability, which  
130 included (1) no additional variants yielding either significant or suggestive p-values close to the  
131 lead SNP, (2) the lead SNP was located in a highly repetitive region, or (3) the lead SNPs  
132 showed substantial differences in MAF across European or Latino samples in gnomAD (18).  
133 Therefore, we concluded that these might not be reliable signals. Note that the first criterion  
134 alone was not sufficient to make us deem a result unreliable, as the 10% MAF cutoff may have  
135 been responsible for single-SNP association peaks.

#### 136 Comparison between allelic TDTs of **European** and **Colombian** trios

137 A qualitative comparison of the **European** and **Colombian** aTDT results showed few  
138 commonalities between the two analyses of common SNPs. Except for the peaks at the 8q24.3  
139 chromosomal region, all other genome-wide significant regions in the **European** trios were  
140 neither significant nor suggestive in the **Colombian** trios, and vice versa. The lack of new  
141 signals from the **Combined** trios supports this observation. For the purposes of comparison,  
142 Table 1 lists all **European** peaks and contains the smallest association p-values with their

143 corresponding estimated odds ratios (OR) observed in the **Colombian** and **Combined** aTDTs  
144 within 500 KB on either side of each **European** peak SNP (Table 1 columns 4-7). Since allele  
145 frequencies for specific SNPs may differ between the two samples, this provides a region-level  
146 view of replication across the samples. Similarly, Table 2 lists the **Colombian** peaks, along with  
147 the minimum association p-values and corresponding odds ratios observed in the **European** and  
148 **Combined** aTDTs within 500 KB on either side of each **Colombian** peak. As seen in Tables 1  
149 and 2, **European** and **Colombian** trios differ considerably with respect to the genomic regions  
150 that show significant association to CL/P.

Table 1. Significant associations in **European** (315 trios) compared with **Colombian** (265 trios) and **Combined** (580 trios).

| Significantly associated locus in European aTDT | RS number (bp position) of lead variant in European aTDT | p-value (effect size) of lead variant in European aTDT | Strongest association seen near European lead variant in Colombian aTDT |                             | Strongest association seen near European lead variant in Combined aTDT |                              |
|-------------------------------------------------|----------------------------------------------------------|--------------------------------------------------------|-------------------------------------------------------------------------|-----------------------------|------------------------------------------------------------------------|------------------------------|
|                                                 |                                                          |                                                        | p-value (OR)                                                            | RS number (bp position)     | p-value (OR)                                                           | RS number (bp position)      |
| 1p36.13                                         | rs78998514<br>(18,608,118)                               | 3.4E-08 (2.05)                                         | 2.2E-04 (1.83)                                                          | rs753305<br>(18,143,515)    | 9.2E-06 (1.55)                                                         | rs78998514<br>(18,608,118)   |
| 2p25.3                                          | rs1362227148<br>(1,361,834)                              | 7.6E-12 (0.32)                                         | 5.0E-04 (0.51)                                                          | rs13429476<br>(968,756)     | 7.1E-04 (0.67)                                                         | rs72762992<br>(907,551)      |
| 2p24.3                                          | rs36094286<br>(15,787,755)                               | 1.4E-14 (0.13)                                         | 2.7E-04 (1.71)                                                          | rs7569215<br>(16,017,189)   | 1.2E-03 (1.42)                                                         | rs340727<br>(16,207,847)     |
| 2q14.1                                          | chr2:113,497,779                                         | 2.6E-08 (0.31)                                         | 6.3E-03 (0.65)                                                          | –<br>(113,537,068)          | 7.1E-05 (1.81)                                                         | rs112243068<br>(113,381,134) |
| 2q35                                            | rs1164161401<br>(216,293,984)                            | 2.3E-08 (0.22)                                         | 4.2E-05 (1.52)                                                          | rs3770473<br>(216,634,116)  | 8.9E-05 (1.74)                                                         | rs2712179<br>(216,768,013)   |
| 5q11.2                                          | rs1290483247<br>(54,785,929)                             | 4.4E-13 (0.13)                                         | 3.4E-04 (0.54)                                                          | rs113820400<br>(54,451,286) | 9.9E-04 (0.65)                                                         | rs113820400<br>(54,451,286)  |
| 6p22.2                                          | rs1747567<br>(25,529,642)                                | 8.6E-12 (0.22)                                         | 1.8E-02 (1.64)                                                          | rs9366622<br>(25,414,309)   | 4.7E-04 (1.49)                                                         | rs34164888<br>(25,521,693)   |
| 6q25.3                                          | chr6:157,311,140                                         | 5.98E-12 (0.33)                                        | 3.83E-03 (0.53)                                                         | rs9505843<br>(157,522,349)  | 8.6E-04 (1.61)                                                         | rs34164888<br>(157,582,486)  |
| 8q24.21                                         | rs72728755<br>(128,978,136)                              | 1.29E-10 (2.39)                                        | 4.92E-06 (2.37)                                                         | rs79382561<br>(128,819,668) | 1.4E-14 (2.13)                                                         | rs72728755<br>(128,978,136)  |
| 8q24.3                                          | rs1429661747<br>(143,179,754)                            | 1.4E-08 (0.31)                                         | 2.7E-03 (1.89)                                                          | rs57681929<br>(143,410,437) | 3.6E-03 (0.71)                                                         | rs7463227<br>(143,187,836)   |
| 9p11.2                                          | rs1471353675<br>(40,816,247)                             | 4.8E-08 (0.37)                                         | 2.7E-03 (1.65)                                                          | –<br>(41,288,651)           | 1.2E-01 (0.79)                                                         | –<br>(41,155,200)            |
| 9q34.2                                          | rs879409092<br>(133,278,859)                             | 1.3E-10 (0.08)                                         | 2.5E-03 (1.89)                                                          | rs2073921<br>(133,162,643)  | 5.6E-04 (0.66)                                                         | rs62576050<br>(133,525,936)  |
| 12p13.32                                        | rs1293776695<br>(3,555,780)                              | 5.2E-09 (0.24)                                         | 1.4E-04 (0.57)                                                          | rs727864<br>(3,307,233)     | 1.3E-04 (1.48)                                                         | rs588106<br>(3,122,022)      |
| 12p13.31                                        | rs1463969293<br>(5,928,511)                              | 6.0E-08 (0.20)                                         | 9.6E-04 (1.58)                                                          | rs61917137<br>(6,260,869)   | 3.3E-03 (1.35)                                                         | rs216852<br>(5,975,025)      |



|          |                              |                |                |                              |                |                              |
|----------|------------------------------|----------------|----------------|------------------------------|----------------|------------------------------|
| 17p11.2  | rs1446333119<br>(21,895,128) | 1.3E-12 (0.11) | 6.4E-03 (0.70) | rs8080056<br>(21,545,419)    | 9.9E-04 (0.73) | rs8080056<br>(21,545,419)    |
| 18p11.21 | rs576835177<br>(13,288,784)  | 1.4E-08 (0.21) | 3.4E-04 (0.56) | rs12957953<br>(13,180,059)   | 1.5E-03 (1.36) | rs11080665<br>(13,643,180)   |
| 18q23    | rs1381043271<br>(79,225,853) | 1.1E-09 (0.25) | 2.7E-03 (0.64) | rs11876371<br>(79,778,636)   | 8.5E-04 (0.69) | rs11876371<br>(79,778,636)   |
| 20q11.1  | rs1321001584<br>(29,360,893) | 5.0E-09 (0.25) | 8.8E-04 (0.46) | 28937230<br>(28,937,230)     | 2.9E-02 (0.79) | –<br>(29,801,022)            |
| Xq28     | rs306890<br>(155,757,485)    | 4.6E-08 (2.09) | 3.2E-03 (1.49) | rs145079381<br>(155,955,827) | 2.0E-04 (1.62) | rs150716120<br>(155,757,485) |

152 Note: p-values reported for **Colombian** and **Combined** trios are located within 500 MB of the lead SNP in the **European** trios.

153

154 Table 2. Significant associations in **Colombian** (265 trios) compared with **European** (315 trios) and **Combined** (580 trios).

| Significantly associated locus in Colombian aTDT | RS number and bp position of lead variant in Colombian aTDT | p value (effect size) of lead variant in Colombian aTDT | Strongest association seen near Colombian lead variant in European aTDT |                            | Strongest association seen near Colombian lead variant in Combined aTDT |                            |
|--------------------------------------------------|-------------------------------------------------------------|---------------------------------------------------------|-------------------------------------------------------------------------|----------------------------|-------------------------------------------------------------------------|----------------------------|
|                                                  |                                                             |                                                         | p value (OR)                                                            | RS number (bp position)    | p value (OR)                                                            | RS number (bp position)    |
| 6p25.3                                           | rs376150594<br>(677,242)                                    | 2.6E-09 (0.27)                                          | 4.2E-04 (0.51)                                                          | rs62389424<br>(422,631)    | 2.4E-04 (0.60)                                                          | rs59342393<br>(900,025)    |
| 8q24.3                                           | rs879371667<br>(144,767,652)                                | 6.4E-09 (0.28)                                          | 1.5E-02 (0.73)                                                          | rs2979293<br>(144,965,922) | 2.0E-02 (1.33)                                                          | rs2730064<br>(144,743,132) |
| 19p13.2                                          | rs113870866<br>(7,692,010)                                  | 1.3E-09 (0.11)                                          | 5.2E-05 (1.69)                                                          | rs74176226<br>(7,296,552)  | 1.3E-03 (0.67)                                                          | –<br>(7,794,108)           |
| 21q22.3                                          | rs2839575<br>(42,706,006)                                   | 9.8E-09 (2.48)                                          | 1.8E-04 (0.45)                                                          | –<br>(42,629,765)          | 1.2E-05 (1.62)                                                          | rs2839575<br>(42,706,006)  |

155 Note: p-values reported for **European** and **Combined** trios are located within 500 MB of the lead SNP in the **Colombian** trios.

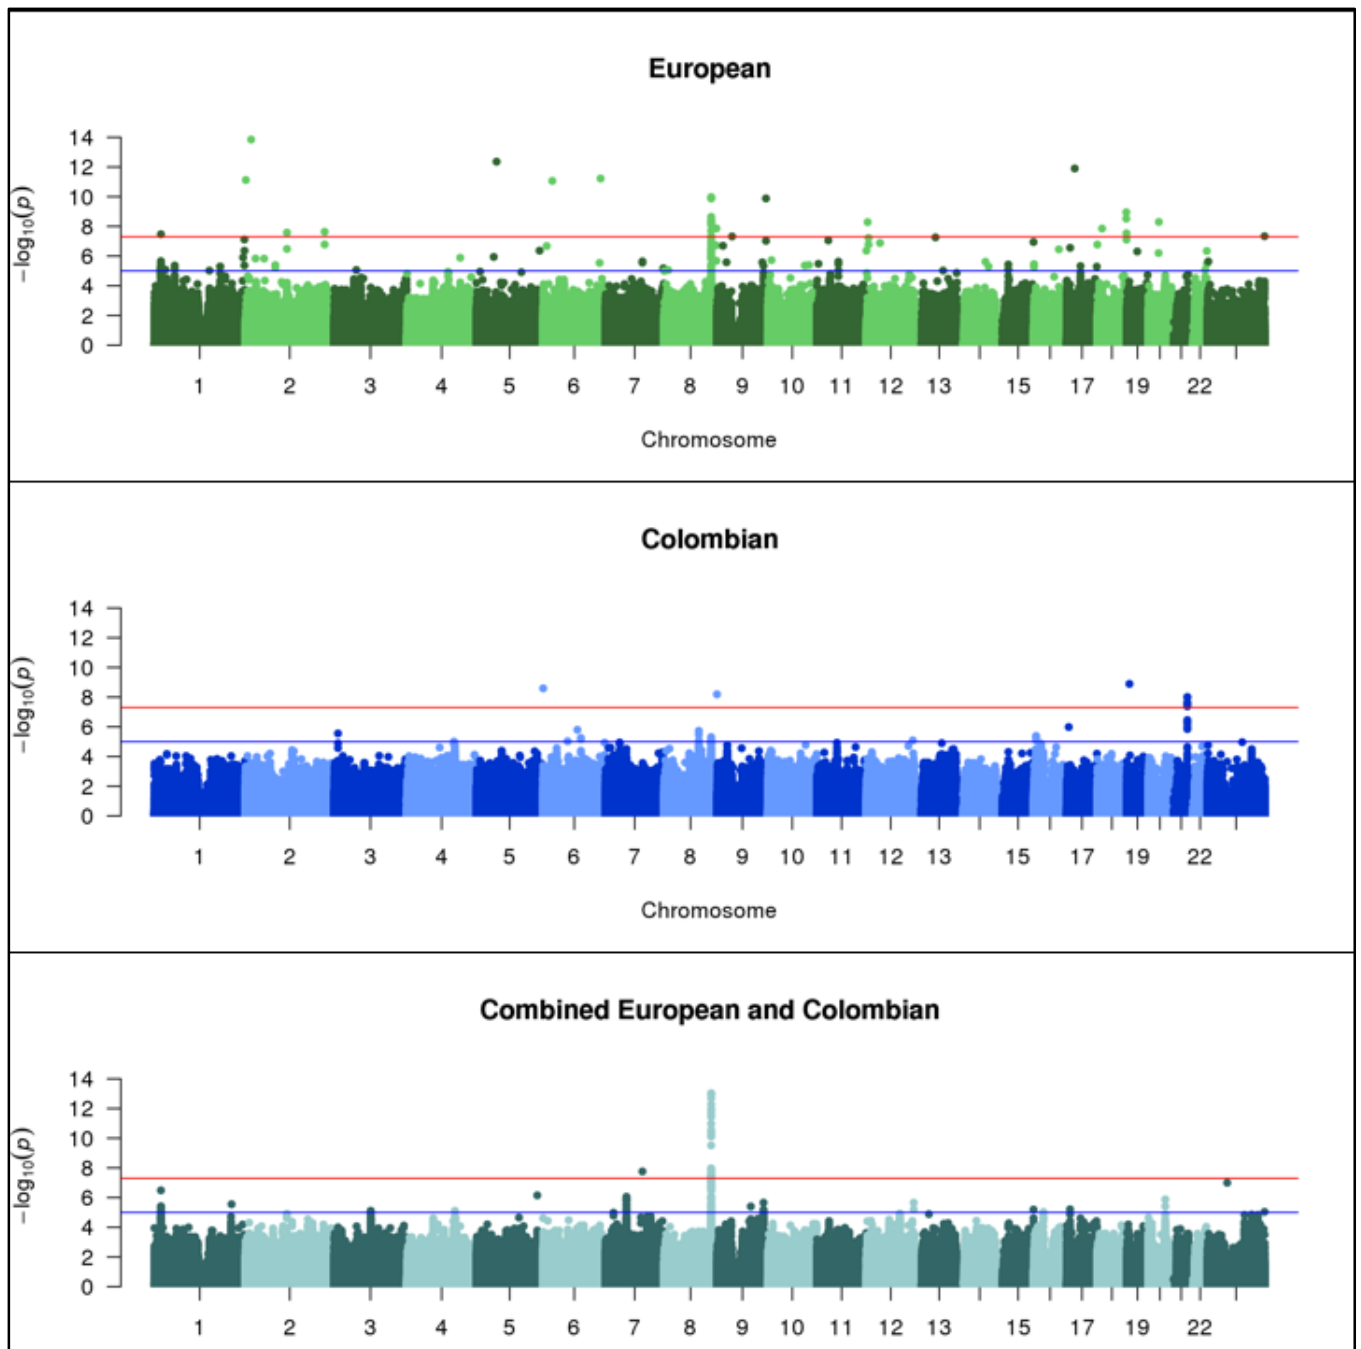

156  
157 Figure 1. Manhattan plots of **European (315 trios)**, **Colombian (265 trios)** and **Combined (580 trios)**  
158 allelic TDTs

159 Previously reported OFC risk loci

160 Two of the genome-wide significant associations observed in this study, 1p36.13 and 8q24.21, have  
161 been previously reported as associated with risk to OFCs by our group and others (19-21). The 1p36.13  
162 peak is located 23kb upstream of the transcription start site of the *PAX7* gene. These associations were

163 significant only in our **European** trios, consistent with previous studies suggesting a stronger  
164 association in participants of European ancestry compared to other racial/ethnic groups (22).

165 The 8q24.21 region has been consistently implicated in nearly all previous OFC studies especially  
166 among samples of European ancestry. The lead SNP among **Europeans** (rs55658222) is in strong  
167 linkage disequilibrium (LD) with another SNP rs987525 in the HapMap European sample. The  
168 rs987525 SNP was found to be the lead SNP in this region in several previous GWASs. This SNP also  
169 showed modest evidence of association and linkage in the **Colombian** trios (p-value 8.609e-06, odds  
170 ratio=1.984, CI= [1.46–2.69]). In the **European** trios, a suggestive association was observed for an  
171 indel located at 9,295,770 bp on chromosome 17, approximately 52kb centromeric to the *NTN1* gene  
172 (p=2.77e-07, odds ratio=0.29, CI=[0.18–0.48]). None of the other previously reported OFC variants  
173 reached even a suggestive level of significance (suggestive threshold  $p < 1.0e-05$ ) in our WGS study,  
174 which is not unexpected given the smaller sample size of this WGS study compared to published  
175 GWASs. Supplement S2 Table shows the most significant aTDT p-values within 500 KB of all  
176 previously reported OFC risk variants.

#### 177 Chromosome 21q22.3 association in the **Colombian** trios

178 We observed genome-wide significant associations in the **Colombian** trios within a 30kb interval on  
179 chromosome 21q22.3 (Figure 2, top panel). In this sample, the common variants had relatively large  
180 estimated odds ratios ranging from 2.33 to 2.48, i.e. approximately two-fold increases in the  
181 transmission of the risk alleles from parents to the proband offspring. The smallest p-value was observed  
182 at rs2839575 (p=9.75e-09, odds ratio=2.48, 95% CI = [1.81–3.45]).

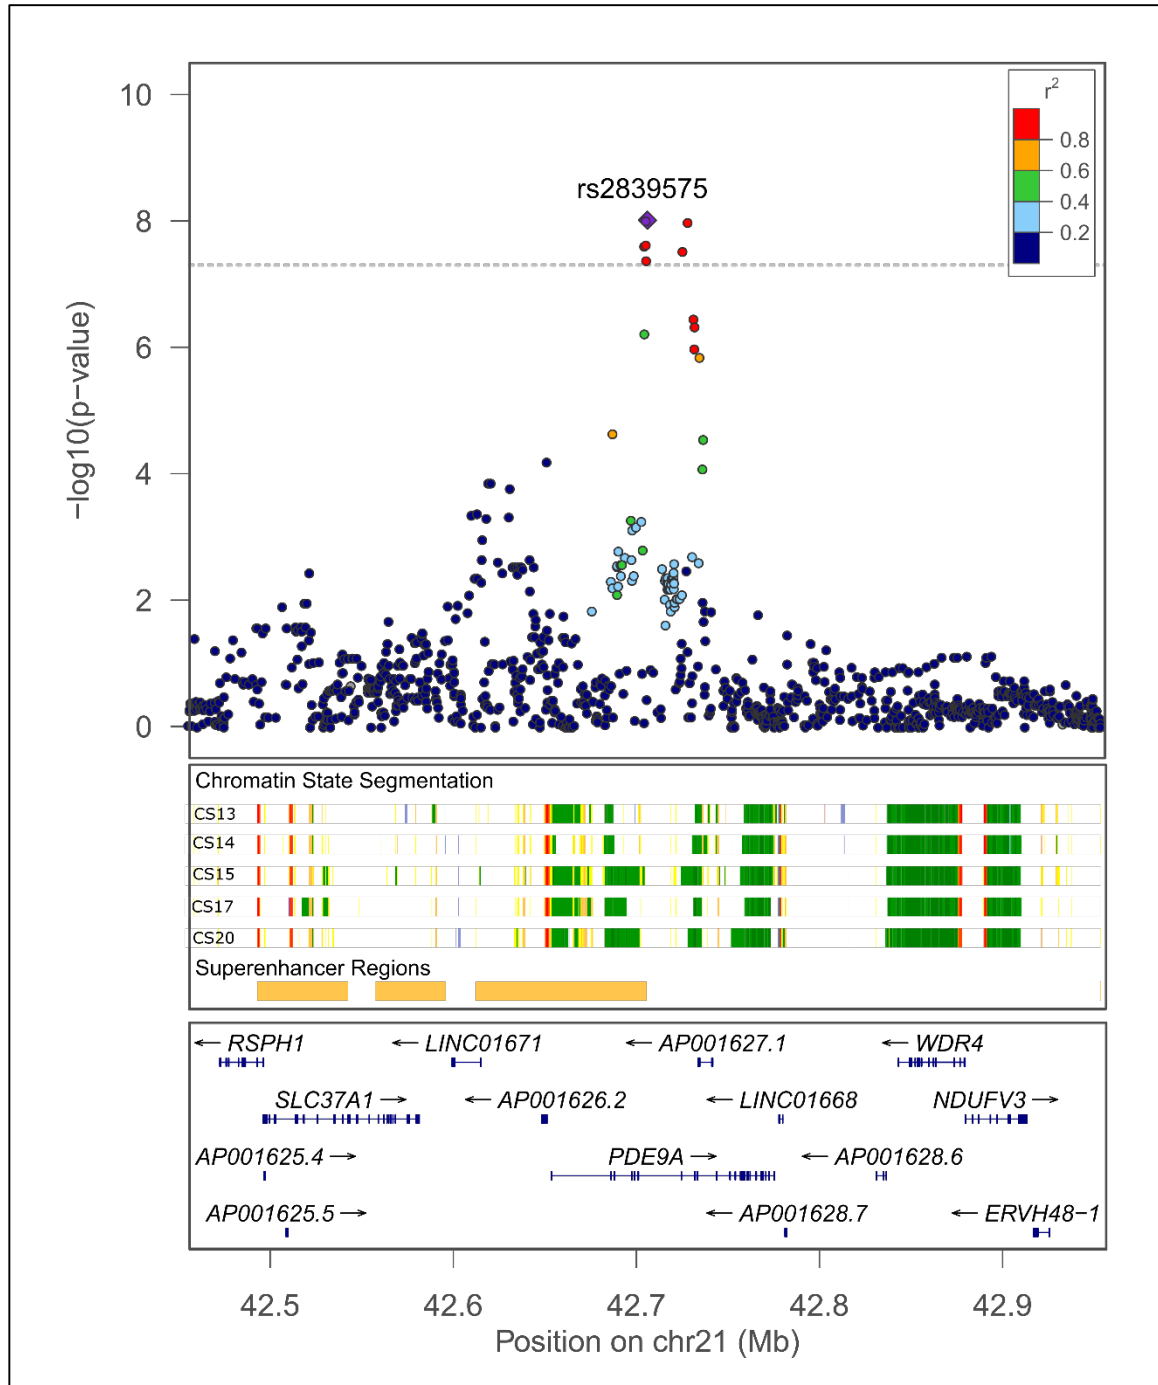

Figure 2.  $\text{Log}_{10}(p)$  for SNPs and indels in chromosome 21q22.3 peak region.

183  
184  
185  
186 GWAS of a Latino sample from a previous study, the POFC Multiethnic study (24), reported  
187 suggestive association at this genomic region (see Figure 1 in (23)). That Latino sample included diverse  
188 Hispanic groups from the US, Guatemala, Argentina, and Colombia, and all of the current WGS

189 **Colombia** trios were part of the POFC Multiethnic study. However, the POFC Multiethnic study had  
190 129 additional Colombian trios. In that study, the GWASs of Asian and European samples did not show  
191 association in this region, and nor did the combined GWAS of all the POFC Multiethnic study samples.  
192 The fact that the current WGS case-parent trio study yielded a genome-wide significant association with  
193 a smaller sample size suggests this association might be unique to **Colombians**. We explored the  
194 validity and implications of this observation through a number of analyses, as described below.

195 We first examined the aTDT p-values for our **Colombian** WGS trios using their SNP array data  
196 from the POFC Multiethnic study. The p-values in this region were nearly identical to those observed in  
197 our WGS association, confirming the association we observed here was not an artifact of sequencing.

198 We next investigated whether population substructure within the Colombian parents could have  
199 caused the observed association in the WGS data by examining the ancestry principal components (PCs)  
200 as well as results of quantitative association between PCA eigenvalues to variants within the peak region  
201 (see Methods for details). PCA showed no evidence of population substructure (supplementary figure S1  
202 Figure 2A), and no association was observed between the eigenvalues and variants in the chromosome  
203 21q22.3 region (supplementary figure S1 Figure 2B). A positive association between eigenvalues and  
204 variants would have indicated that the observed association with CL/P is in reality due to population  
205 substructure, therefore, this association did not appear to be an artifact of population admixture.

206 We verified that this region does not show evidence of association in other Latin Americans, by  
207 reanalyzing imputed genotype data from the previously published POFC Multiethnic GWAS study (23).  
208 P-values from the aTDT of independent trios and the corresponding odds ratios at rs2839575 in each  
209 Latino subpopulation were considerably different from those observed in the Colombian subjects  
210 (Figure 3A, forest plot). In fact, in contrast to the Colombians, none of the other Latino populations  
211 (except Colombia) showed a significant association at rs2839575. Moreover, the combined set of non-

212 Colombian Latinos resulted in much weaker associations across a 1 MB region flanking SNP rs2839575  
213 as well as for this SNP itself. The odds ratios at the rs2839575 variant showed an opposite (although  
214 non-significant) effect in the non-Colombian Hispanics as compared to Colombians (Figure 3B, regional  
215 p-value plot and supplementary table S3 Table). We concluded from the stratified aTDT results that this  
216 SNP influences OFC risk only in Colombians.

217 We therefore investigated the possibility of ancestry differences between our Colombian sample and  
218 the other Latino populations. Ancestry principal components calculated from the POFC Multiethnic  
219 SNP genotype data (unrelated individuals only), showed Colombians to be ancestrally diverse from the  
220 other Latino populations (supplementary figure S1 Figure 3).

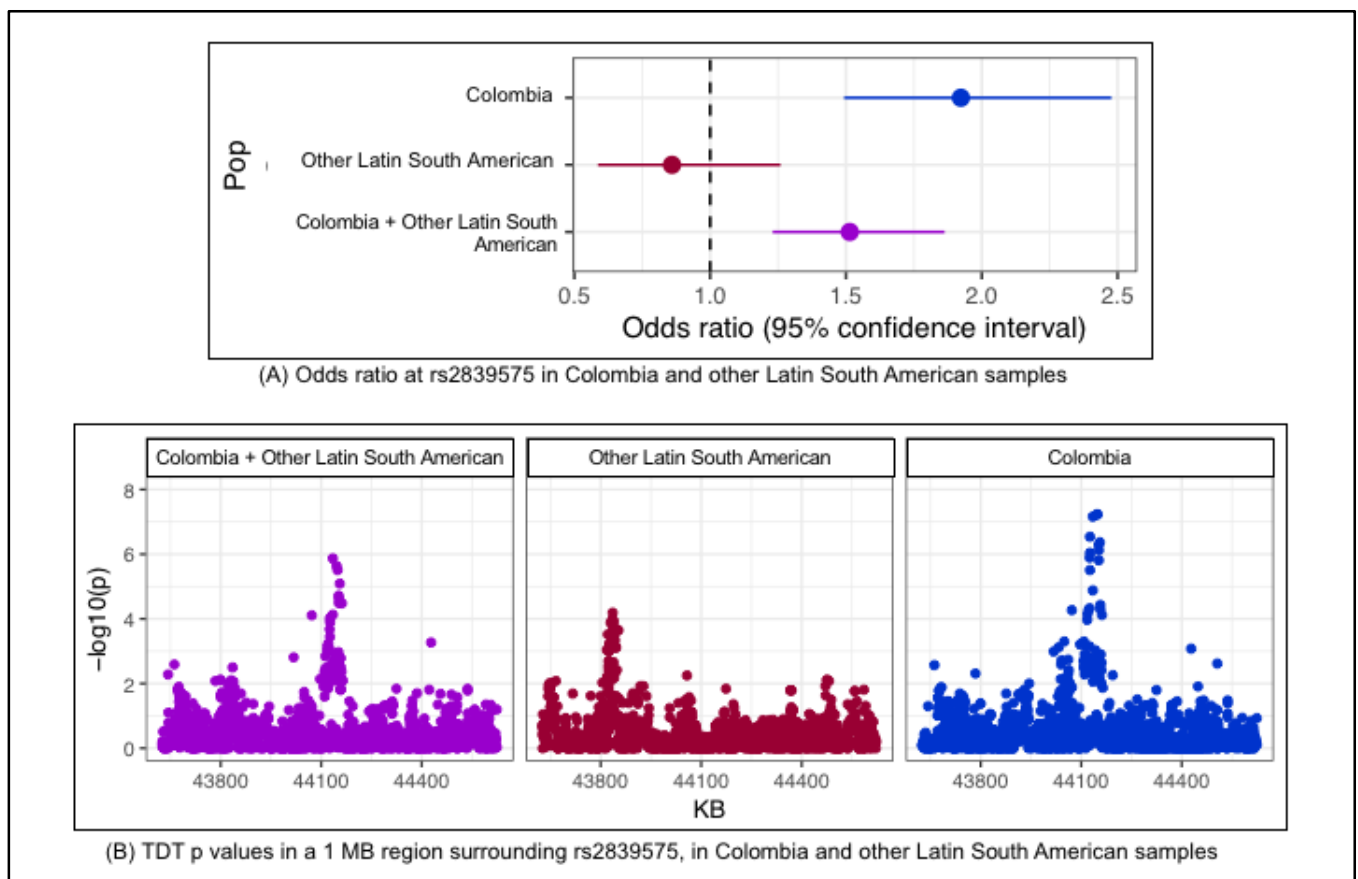

221  
222 Figure 3. Estimated odds ratios (with 95%CI) and  $-\log_{10}(p)$ -values) from the aTDT in Colombia and  
223 other Latino samples  
224

225        Given that the 21q22.3 association is observed only in the Colombian sample and that the ancestry  
226        of Colombians is different from the other Latin American samples, we checked whether the absence of  
227        an association signal in the other Latin American samples merely reflects differences in MAF rather  
228        than differences in true effects of risk alleles. That is, it is possible that a causal variant exists in all  
229        populations but has a considerably higher frequency (or is in LD with a variant of higher frequency) in  
230        the Colombians. Given the population history of Colombians, causal OFC variants are may have arisen  
231        from one particular ancestral group, and such variants may be more frequent (and therefore more  
232        informative) among Colombians. The origin of African ancestry of Colombians is different from that of  
233        the other Latino populations (24). We therefore looked at the frequencies of the Colombian risk alleles  
234        across different populations. For this analysis, we again turned to genotyped and imputed SNP  
235        genotypes from the POFC Multiethnic study. The MAFs of the 30 most significantly associated SNPs  
236        within the 21q22.3 peak region in Colombian trios were compared to 15 populations defined by country  
237        of recruitment from the POFC Multiethnic study. None of these 30 SNPs had higher MAF among  
238        Colombians compared to other Latino populations (supplementary figure S1 Figure 4). Moreover, the 15  
239        most significant SNPs in this peak region had higher allele frequencies in all other population groups  
240        (European, African, and Asian) compared to Colombians or other Latinos. Thus, there was no  
241        conclusive evidence that population-specific variants contributed to the association signal seen in this  
242        study. However, several of these variants had estimated odds ratios between 1.1 and 1.5 in Asian,  
243        Europeans, or Africans, suggesting these variants in this region may also increase risk for OFCs in other  
244        populations, but at a reduced level.

245        Finally, we tested for effects of rare variants within the **Colombian** trios using burden and  
246        collapsing tests because we observed a number of low-frequency and rare variants with large odds ratios  
247        in this region (see Methods for rare variant testing procedure). Common variants with the strongest

248 associations were all intronic variants within the *PDE9A* gene; however, all had moderate odds ratios  
249 around 2.0. In this region, there were 37 SNPs with minor allele frequencies near or below 1% in the  
250 **Colombian** trios and estimated OR > 5 (supplementary table S4 Table), including mainly intronic and a  
251 few intergenic SNVs (28 intronic, 8 intergenic). The exception was one non-synonymous SNV,  
252 rs138007679 in the *RSPHI* gene (aTDT odds ratio 8, 95% CI = [1.001–63.96]), which produces an  
253 amino acid change (A>C, leucine to tryptophan according to ClinVar). Alone, this variant does not  
254 clearly implicate *RSPHI* over other genes in the region, so we performed a rare variant TDT on all non-  
255 synonymous variants within the 13 genes falling in this region. None of the individual genes achieved  
256 the nominal significance (supplementary table S5 Table), so this result remained inconclusive. We also  
257 carried out rare variant TDTs of intronic and intergenic variants with similar results, finding only  
258 nominally significant associations attributable to intergenic, low frequency variants (MAFs ranging  
259 between 0.5% and 1%) .

260 In the absence of any clearly pathogenic variant or gene based on combined effects of rare  
261 variants, we examined regulatory elements and protein-protein interaction pathways in this region with  
262 respect to craniofacial development. All associated variants below a suggestive level of significance  
263 ( $p < 1.0e-05$ ) were located within the *PDE9A* gene, which does not have any known role in controlling  
264 risk to OFCs. However, the *PDE9A* gene overlaps a super-enhancer region for craniofacial development  
265 identified from histone profiling in early human craniofacial development (25). Multiple genes in the  
266 region, including *PDE9A*, appear to be actively transcribed during human craniofacial development  
267 (Figure 2). Another gene of interest is *UBASH3A*, located ~220kb centromeric to this peak signal. The  
268 *UBASH3A* protein was previously shown to physically associate with *SPRY2* via a yeast two-hybrid  
269 assay (33). *SPRY2* has been reported by GWASs of OFC and shown required for palatogenesis in mice  
270 (26); whether *UBASH3A* is also expressed in craniofacial structures has not yet been determined.



271

272 **Discussion**

273

274 This study is the first large scale WGS study of OFCs, one of the most common birth defects  
275 worldwide, using a case-parent trio design. We conducted association analyses of common variants from  
276 WGS in two samples of case-parent trios, one of European ancestry and the other of Latin American  
277 ancestry from Colombia. We replicated two known OFC loci and identified a promising new region on  
278 chromosome 21 in the Colombian sample. A combined association analysis of these two samples  
279 together clearly shows that OFC risk loci differ by ethnicity. The 8q24 locus has been repeatedly shown  
280 to be associated with risk of OFCs in both case-control and case-parent trio samples from a range of  
281 ethnicities such as Europeans and Latin Americans, with some evidence from Asians (27). Here, we  
282 found slight differences in the larger 8q24 region between Europeans and Latin Americans but there  
283 appears to be a shared risk locus at 8q24.21, consistent with Colombians having a strong influence from  
284 European ancestry. *IRF6*, a gene that has been linked to OFCs in samples of Asian and Latino ancestry  
285 was not detected in our Colombian trios, possibly due to the small sample size.

286 We observed evidence of linkage and association to a previously unreported region on chromosome  
287 21 spanning the *PDE9A* gene only in the Colombian sample. We verified that this locus is unique to  
288 Colombians, by running separate aTDTs in Colombian and non-Colombian Latino trios using imputed  
289 genotype data from the previous POFC Multiethnic GWAS study (23). We examined whether the  
290 apparent risk alleles have ancestral origins from non-Latino populations and noted that the estimated  
291 effect sizes were slightly elevated in Asian, European and African populations although never achieving  
292 genome-wide significance. However, larger or more phenotypically specific samples may be necessary  
293 to find conclusive statistical evidence. The significantly associated common variants in the chromosome  
294 21q22.3 peak were mostly intronic or intergenic, with no obvious biological function. There were a

295 number of rare variants with large aTDT odds ratios, including a non-synonymous SNP within the  
296 *RSPHI* gene, however, TDT of rare coding non-synonymous variants did not provide conclusive  
297 statistical evidence of association between genes in this region and CL/P. Although none of the genes in  
298 this region are known to contribute to the development of OFCs, they appear to be actively transcribed  
299 during human craniofacial development and should be examined further in follow up studies.

## 300 **Research Design and Methods**

### 301 Study design

302 Two samples of case-parent trios were analyzed for the current family-based association study, one  
303 of European descent recruited from sites around the United States, Argentina, Turkey, Hungary and  
304 Madrid, and a second of trios from Medellin, Colombia. The two samples are referred to as **European**  
305 and **Colombian** respectively, in this study. Recruitment of participants and phenotypic assessments were  
306 done at regional treatment centers for orofacial clefts after review and approval by the site-specific  
307 IRBs.

308 This study included case-parent trios consisting of affected offspring and their parents (see Table 3).  
309 Most of the **European** parents and all **Colombian** parents are unaffected for CL/P (see breakdown of  
310 trios in Table 3). All trios had offspring with a cleft lip or a cleft lip plus cleft palate, and had not been  
311 diagnosed with any recognized genetic syndrome. The affection status was defined as cleft lip with or  
312 without cleft palate (CL/P) for all analyses here because the Colombian sample did not have the  
313 breakdown between cleft lip alone (CL) versus cleft lip with cleft palate (CLP). Table 3 shows the  
314 counts of GMKF trios sequenced for the present study, by their country of origin.

315

| Sample   | Total Trios | Trios with no affected parents | Trios with 1 affected parent | Trios with 2 affected parents |
|----------|-------------|--------------------------------|------------------------------|-------------------------------|
| European | 315         | 280                            | 32                           | 3                             |

|                  |     |     |    |   |
|------------------|-----|-----|----|---|
| Site: USA        | 209 | 185 | 21 | 3 |
| Hungary          | 56  | 51  | 5  |   |
| Madrid           | 30  | 26  | 4  |   |
| Argentina        | 1   | 1   |    |   |
| Turkey           | 19  | 17  | 2  |   |
| <b>Colombian</b> | 265 | 265 |    |   |
| <b>Total</b>     | 580 | 545 | 32 | 3 |

316 Table 3. Counts of CL/P trios by recruitment site and cleft type (add?)  
317

318 Genetic data

319 Whole genome sequencing of the European sample was carried out at the McDonnell Genome  
320 Institute (MGI), Washington University School of Medicine in St. Louis, while sequencing of the  
321 Colombian sample was conducted at the Broad Institute, both with an average of 30X coverage. Variant  
322 calling on the European trios was performed using pipelines at MGI, and aligned to the GRCh37/hg19  
323 genome assembly. The European sample's genotypes were realigned and recalled by the GMKF's Data  
324 Resource Center at Children's Hospital of Philadelphia to match the Colombian sample, which was  
325 aligned to hg38 and called using GATK pipelines (28-30) at the Broad Institute  
326 (<https://software.broadinstitute.org/gatk/best-practices/workflow>). The alignment and joint genotyping  
327 workflow used to harmonize these two samples of case-parent trios was developed using GATK Best  
328 Practice recommendations, with the goal of being functionally equivalent with other current large  
329 genomic research efforts. Briefly, the harmonization pipeline first converted the mapped alignments  
330 within each sample to unmapped alignments, then re-ran the GATK genotyping workflow, namely base  
331 quality score recalibration (BQSR), simultaneous calling of SNPs and indels using single sample variant  
332 calling (HaplotypeCaller), multiple sample joint variant calling, and finally refinement and filtering of  
333 called variants. Data processing and storage of harmonized results was done on the Cavatica platform  
334 within an Amazon Web Services (AWS) environment. The GMKF Data Resource Center (DRC) was  
335 responsible for tracking, final checking, and release of the variant calls via its portal. The released

336 variant data contained genotypes called at 35,600,754 single nucleotide variants (SNVs) and 4,320,146  
337 indels mapped to the hg38 reference sequence. Details of the harmonization process are provided in the  
338 supplement, S1 section “Kids First DRC Genomics Harmonization Pipeline Description”.

339 Assessment of sample data quality and data cleaning

340 Each sample of trios (**European, Colombian**) was separately analyzed for genotyping  
341 inconsistencies, at an individual level, as well as on a trio basis. **Genotype quality:** Genotypes with  
342 either unacceptable read depth (minimum depth 10 reads for autosomes; minimum 5 reads for X  
343 chromosomes in males), or genotyping quality (minimum GQ 20; minimum GQ=10 for X chromosome  
344 variants in males) were first set to unknown. **Sample quality:** Each individual’s set of variant calls was  
345 checked for excess heterozygosity ( $> 3$  standard deviations from mean heterozygote/homozygote ratio),  
346 deviant transition to transversion ratios ( $Ts/Tv > 3$  standard deviations from mean  $Ts/Tv$  across  
347 samples), low genotyping rates (below 90%), and for inconsistency between the average homozygosity  
348 on the X-chromosome and the individual’s reported sex. Each trio was assessed for Mendelian error  
349 rates and deviation from the expected degree of relatedness between each set of parents and offspring.  
350 Genomes flagged for sex or relationship issues were compared with SNP array genotypes from the  
351 POFC Multiethnic study (23) to resolve sample swaps or misclassification of sex, where possible (some  
352 trios from our study were not part of POFC Multiethnic study). A trio was excluded if it failed more than  
353 one of these data quality tests, and if recovery was not possible after comparison with the SNP array  
354 genotype data.

355 After QC procedures, the final dataset consisted of 315 complete European trios and 265 complete  
356 Colombian trios. Biallelic variants including SNPs and short indels (indels range between 1-10,000 BP  
357 in length) with a genotyping rate of at least 90% were included in our analyses. A total of 5,374,579

358 variants were analyzed in the **European** trios, and 4,905,638 in **Colombian** trios. Of these, 4,220,712  
359 variants were analyzed for the **Combined** trios.

### 360 Genome-wide wide association testing of SNPs and indels

361 Genome-wide association was conducted using two versions (allelic and genotypic) of the  
362 transmission disequilibrium test (TDT), for each polymorphic variant. The PLINK software (31, 32) was  
363 used to run the standard genome-wide allelic TDT (aTDT), which does not consider the parents' cleft  
364 status. We also ran genotypic TDT (gTDT) (33) on the trios, and compared the association p-values to  
365 those from the aTDT. Effect sizes are not directly comparable between the two methods. The aTDT  
366 compares the transmission of a target allele to the affected child from heterozygous parents (34), and is  
367 based on McNemar's chi-square statistic. Because only heterozygous parents can contribute to this  
368 statistic, statistical power is greatly influenced by minor allele frequency (MAF) and one population  
369 may have considerably more or less power at any given SNP when MAF varies across populations. The  
370 gTDT compares the observed genotype in the child to "pseudo-controls" representing other genotypes  
371 possible from the parental mating type. Schwender et al. (35, 36) demonstrated an efficient method for  
372 computing this gTDT statistic. Because either TDT represents a test of strict Mendelian inheritance of  
373 the marker (despite sampling case-parent trios through the affected proband), this test is robust to  
374 spurious associations arising from population stratification and can provide greater power for rare  
375 phenotypes (37). The null hypothesis of either TDT is the complete absence of either linkage between  
376 the marker and an unobserved causal gene or linkage disequilibrium (LD) between the marker and an  
377 unobserved causal gene. Rejection of this composite null hypothesis implies the presence of both  
378 linkage and LD. The TDT is most appropriate for our study, given our participants originate from  
379 diverse populations, and the Colombians in particular are known to reflect varying degrees of admixture  
380 of African, Hispanic, Native American and European genes.

381 Three genome-wide TDT analyses were run: separately in European and Colombian trios and then in  
382 all trios combined. Significance p-values for the allelic TDT statistic were calculated using the exact  
383 binomial distribution. Although the TDT statistic is robust to population substructure, an overall TDT  
384 analysis can mask subgroup specific results, thus principal component analysis (PCA) was run on the  
385 parents separately for each sample (**European, Colombian**) and the normalized eigenvalues examined  
386 for evidence of sub-groups within each sample. For PCs producing eigenvalues exceeding  $\pm 5$ , we  
387 conducted genetic association assuming an additive model using the eigenvalues of each individual as  
388 quantitative traits. The PCA was conducted using the KING program (38). PLINK (31, 32) was used to  
389 run the quantitative association.

#### 390 Identification of significant associations

391 Due to our limited sample sizes, only SNPs with a minor allele frequency of at least 10% within  
392 each sample of trios were considered in these TDT analyses. The allelic TDT test relies on asymptotics,  
393 and can give inflated associations for lower MAF SNPs at this sample size when applied genome-wide.  
394 We subsequently examined lower-MAF SNPs in specific regions for fine-mapping purposes (see  
395 below). The genome-wide threshold for significant association was set at  $5.0e-08$ , and the critical value  
396 for suggestive association was set at  $1.0e-05$ .

#### 397 Fine mapping and rare-variant association in 21q region

398 A subset of the genome-wide significant associations (i.e. those not overlapping with previously  
399 reported OFC genes/regions) was selected for more in-depth investigation. All biallelic variants with a  
400 genotyping rate of 90% or greater, regardless of MAF, were investigated within each region of interest  
401 (defined as 1Mb centered on each lead variant). Each interval was annotated for possible roles in  
402 craniofacial development by literature searches of all genes contained within that interval, functional  
403 annotation of variants using multiple tools including Bystro (39), Variant Effect Predictor (40), and

404 HaploReg (41). We also queried the UCSC genome browser's gene-by-gene interaction track for known  
405 OFC genes/regions. This track identifies genes reported in protein-interaction databases and recognized  
406 biological pathways (42).

407 Rare variant (RV) association using the TDT framework was run only for regions containing SNPs  
408 showing significant evidence of linkage and association in the aTDT. For each association peak, we  
409 identified all genes located within 500 KB of the lead SNP, and selected non-synonymous RVs within  
410 the exons of these genes. Burden and collapsing methods were used, as our dataset is composed solely  
411 of case-parent trios, and these tests were applied to each gene separately, after phasing the observed  
412 genotype data of common SNPs. Beagle was used to calculate haplotypes (43) using all variants within a  
413 selected region. The RV-TDT software (44) was then run on phased haplotypes for exonic, non-  
414 synonymous SNVs in genes with a minimum of 4 variant sites. RV-TDT reports burden and combined  
415 multivariate and collapsing (CMC)-types of test statistics, as well as a weighted sum statistic. The  
416 observed MAFs within European and Colombian parents were used to calculate weights for each RV,  
417 where SNVs with smaller MAFs receiving higher weights. Some of the RV-TDT statistics use phased  
418 haplotypes to calculate empirical p-values by permuting the haplotypes of each parent. In addition to the  
419 exonic rare variants, we also selected intronic and intergenic variants and analyzed these using RV-TDT.  
420 Intronic and intergenic variants were divided up into subsets based on gene locations in this region, and  
421 analyzed using a procedure similar to the exonic, non-synonymous SNPs.

422

### 423 **Acknowledgements**

424 These studies are part of the Gabriella Miller Kids First Pediatric Research Program consortium (Kids  
425 First), supported by the Common Fund of the Office of the Director of the National Institutes of Health  
426 ([www.commonfund.nih.gov/KidsFirst](http://www.commonfund.nih.gov/KidsFirst)). Washington University's McDonell Genome Institute was

427 awarded an administrative supplement (3U54HG003079-12S1) to sequence structural birth defect  
428 samples including the European descent Orofacial Cleft samples for the current study funded through  
429 Kids First (X01-HL132363). Further, the Broad Institute Sequencing Center was awarded a grant  
430 (U24-HD090743) to sequence structural birth defect cohort samples including the Latin American  
431 Orofacial Cleft family samples for the current study funded through Kids First (X01-HL136465). The  
432 sequencing centers plus the Kids First Data Resource Center (kidsfirstdrc.org, supported by the NIH  
433 Common Fund through U2CHL138346) provided quality control analyses in support of this project.

434 The data analyzed and reported in this manuscript were accessed from dbGaP  
435 [[www.ncbi.nlm.nih.gov/gap](http://www.ncbi.nlm.nih.gov/gap); **European trios**: dbGaP accession number phs001168.v2.p2; **Colombian**  
436 **trios**: dbGaP accession number phs001420.v1.p1] and from the Kids First Data Resource Center  
437 (kidsfirstdrc.org). Additional grants supported the assembling of the cohorts, collection of the  
438 phenotypic data and samples, and data analysis [R01-DE016148, R03-DE026469, R01-DE012472, U01-  
439 DD000295, R01-DE014581, R01-DE011931, R37-DE008559, R21-DE016930, and R01-DE015667,  
440 R03-DE027193, R00-DE025060].

441 Many thanks to the participating families and study teams worldwide without whom these studies  
442 would not be possible. Additional thanks to Andrew Lidral, Mauricio Arcos-Burgos, and Andrew  
443 Czeizel.

444

## 445 **References**

- 446 1 Dixon, M.J., Marazita, M.L., Beaty, T.H. and Murray, J.C. (2011) Cleft lip and palate:  
447 understanding genetic and environmental influences. *Nature reviews. Genetics*, **12**, 167-178.  
448 2 Rahimov, F., Jugessur, A. and Murray, J.C. (2012) Genetics of nonsyndromic orofacial clefts.  
449 *The Cleft palate-craniofacial journal : official publication of the American Cleft Palate-Craniofacial*  
450 *Association*, **49**, 73-91.  
451 3 Nidey, N., Moreno Uribe, L.M., Marazita, M.M. and Wehby, G.L. (2016) Psychosocial well-  
452 being of parents of children with oral clefts. *Child: care, health and development*, **42**, 42-50.



- 453 4 Wehby, G.L. and Cassell, C.H. (2010) The impact of orofacial clefts on quality of life and  
454 healthcare use and costs. *Oral diseases*, **16**, 3-10.
- 455 5 Nidey, N. and Wehby, G. (2019) Barriers to Health Care for Children with Orofacial Clefts: A  
456 Systematic Literature Review and Recommendations for Research Priorities. *Oral Health and Dental  
457 Studies*, **2(1):2**.
- 458 6 Naros, A., Brocks, A., Kluba, S., Reinert, S. and Krimmel, M. (2018) Health-related quality of  
459 life in cleft lip and/or palate patients - A cross-sectional study from preschool age until adolescence.  
460 *Journal of cranio-maxillo-facial surgery : official publication of the European Association for Cranio-  
461 Maxillo-Facial Surgery*, **46**, 1758-1763.
- 462 7 Bille, C., Winther, J.F., Bautz, A., Murray, J.C., Olsen, J. and Christensen, K. (2005) Cancer risk  
463 in persons with oral cleft--a population-based study of 8,093 cases. *American journal of epidemiology*,  
464 **161**, 1047-1055.
- 465 8 Bui, A.H., Ayub, A., Ahmed, M.K., Taioli, E. and Taub, P.J. (2018) Association Between Cleft  
466 Lip and/or Cleft Palate and Family History of Cancer: A Case-Control Study. *Annals of plastic surgery*,  
467 **80**, S178-s181.
- 468 9 Taioli, E., Ragin, C., Robertson, L., Linkov, F., Thurman, N.E. and Vieira, A.R. (2010) Cleft lip  
469 and palate in family members of cancer survivors. *Cancer investigation*, **28**, 958-962.
- 470 10 Buniello, A., MacArthur, J.A.L., Cerezo, M., Harris, L.W., Hayhurst, J., Malangone, C.,  
471 McMahon, A., Morales, J., Mountjoy, E., Sollis, E. *et al.* (2019) The NHGRI-EBI GWAS Catalog of  
472 published genome-wide association studies, targeted arrays and summary statistics 2019. *Nucleic acids  
473 research*, **47**, D1005-d1012.
- 474 11 Hazelett, D.J., Conti, D.V., Han, Y., Al Olama, A.A., Easton, D., Eeles, R.A., Kote-Jarai, Z.,  
475 Haiman, C.A. and Coetzee, G.A. (2016) Reducing GWAS Complexity. *Cell cycle (Georgetown, Tex.)*,  
476 **15**, 22-24.
- 477 12 Tak, Y.G. and Farnham, P.J. (2015) Making sense of GWAS: using epigenomics and genome  
478 engineering to understand the functional relevance of SNPs in non-coding regions of the human  
479 genome. *Epigenetics & chromatin*, **8**, 57.
- 480 13 Zhu, Y., Tazearslan, C. and Suh, Y. (2017) Challenges and progress in interpretation of non-  
481 coding genetic variants associated with human disease. *Experimental biology and medicine (Maywood,  
482 N.J.)*, **242**, 1325-1334.
- 483 14 Beaty, T.H., Marazita, M.L. and Leslie, E.J. (2016) Genetic factors influencing risk to orofacial  
484 clefts: today's challenges and tomorrow's opportunities. *F1000Research*, **5**, 2800.
- 485 15 Grosen, D., Bille, C., Petersen, I., Skytthe, A., Hjelmborg, J., Pedersen, J.K., Murray, J.C. and  
486 Christensen, K. (2011) Risk of oral clefts in twins. *Epidemiology (Cambridge, Mass.)*, **22**, 313-319.
- 487 16 Manolio, T.A., Collins, F.S., Cox, N.J., Goldstein, D.B., Hindorff, L.A., Hunter, D.J., McCarthy,  
488 M.I., Ramos, E.M., Cardon, L.R., Chakravarti, A. *et al.* (2009) Finding the missing heritability of  
489 complex diseases. *Nature*, **461**, 747-753.
- 490 17 Wainschein, P., Jain, D.P., Yengo, L., Zheng, Z., Cupples, L.A., Shadyab, A.H., McKnight, B.,  
491 Shoemaker, B.M., Mitchell, B.D., Psaty, B.M. *et al.* (2019) Recovery of trait heritability from whole  
492 genome sequence data. in press., 588020.
- 493 18 Karczewski, K.J., Francioli, L.C., Tiao, G., Cummings, B.B., Alföldi, J., Wang, Q., Collins,  
494 R.L., Laricchia, K.M., Ganna, A., Birnbaum, D.P. *et al.* (2019) Variation across 141,456 human exomes  
495 and genomes reveals the spectrum of loss-of-function intolerance across human protein-coding genes. in  
496 press., 531210.

- 497 19 Ludwig, K.U., Mangold, E., Herms, S., Nowak, S., Reutter, H., Paul, A., Becker, J., Herberz, R.,  
498 AlChawa, T., Nasser, E. *et al.* (2012) Genome-wide meta-analyses of nonsyndromic cleft lip with or  
499 without cleft palate identify six new risk loci. *Nature genetics*, **44**, 968-971.
- 500 20 Birnbaum, S., Ludwig, K.U., Reutter, H., Herms, S., de Assis, N.A., Diaz-Lacava, A., Barth, S.,  
501 Lauster, C., Schmidt, G., Scheer, M. *et al.* (2009) IRF6 gene variants in Central European patients with  
502 non-syndromic cleft lip with or without cleft palate. *European journal of oral sciences*, **117**, 766-769.
- 503 21 Beaty, T.H., Murray, J.C., Marazita, M.L., Munger, R.G., Ruczinski, I., Hetmanski, J.B., Liang,  
504 K.Y., Wu, T., Murray, T., Fallin, M.D. *et al.* (2010) A genome-wide association study of cleft lip with  
505 and without cleft palate identifies risk variants near MAFB and ABCA4. *Nature genetics*, **42**, 525-529.
- 506 22 Leslie, E.J., Taub, M.A., Liu, H., Steinberg, K.M., Koboldt, D.C., Zhang, Q., Carlson, J.C.,  
507 Hetmanski, J.B., Wang, H., Larson, D.E. *et al.* (2015) Identification of functional variants for cleft lip  
508 with or without cleft palate in or near PAX7, FGFR2, and NOG by targeted sequencing of GWAS loci.  
509 *American journal of human genetics*, **96**, 397-411.
- 510 23 Leslie, E.J., Carlson, J.C., Shaffer, J.R., Feingold, E., Wehby, G., Laurie, C.A., Jain, D., Laurie,  
511 C.C., Doheny, K.F., McHenry, T. *et al.* (2016) A multi-ethnic genome-wide association study identifies  
512 novel loci for non-syndromic cleft lip with or without cleft palate on 2p24.2, 17q23 and 19q13. *Human*  
513 *molecular genetics*, **25**, 2862-2872.
- 514 24 Gouveia, M.H., Borda, V., Leal, T.P., Moreira, R.G., Bergen, A.W., Aquino, M.M., Araujo,  
515 G.S., Araujo, N.M., Kehdy, F.S.G., Liboredo, R. *et al.* (2019) Origins, admixture dynamics and  
516 homogenization of the African gene pool in the Americas. in press., 652701.
- 517 25 Wilderman, A., VanOudenhove, J., Kron, J., Noonan, J.P. and Cotney, J. (2018) High-Resolution  
518 Epigenomic Atlas of Human Embryonic Craniofacial Development. *Cell reports*, **23**, 1581-1597.
- 519 26 Welsh, I.C., Hagge-Greenberg, A. and O'Brien, T.P. (2007) A dosage-dependent role for Spry2  
520 in growth and patterning during palate development. *Mech Dev*, **124**, 746-761.
- 521 27 Murray, T., Taub, M.A., Ruczinski, I., Scott, A.F., Hetmanski, J.B., Schwender, H., Patel, P.,  
522 Zhang, T.X., Munger, R.G., Wilcox, A.J. *et al.* (2012) Examining markers in 8q24 to explain differences  
523 in evidence for association with cleft lip with/without cleft palate between Asians and Europeans.  
524 *Genetic epidemiology*, **36**, 392-399.
- 525 28 DePristo, M.A., Banks, E., Poplin, R., Garimella, K.V., Maguire, J.R., Hartl, C., Philippakis,  
526 A.A., del Angel, G., Rivas, M.A., Hanna, M. *et al.* (2011) A framework for variation discovery and  
527 genotyping using next-generation DNA sequencing data. *Nature genetics*, **43**, 491-498.
- 528 29 McKenna, A., Hanna, M., Banks, E., Sivachenko, A., Cibulskis, K., Kernytzky, A., Garimella,  
529 K., Altshuler, D., Gabriel, S., Daly, M. *et al.* (2010) The Genome Analysis Toolkit: a MapReduce  
530 framework for analyzing next-generation DNA sequencing data. *Genome research*, **20**, 1297-1303.
- 531 30 Van der Auwera, G.A., Carneiro, M.O., Hartl, C., Poplin, R., Del Angel, G., Levy-Moonshine,  
532 A., Jordan, T., Shakir, K., Roazen, D., Thibault, J. *et al.* (2013) From FastQ data to high confidence  
533 variant calls: the Genome Analysis Toolkit best practices pipeline. *Current protocols in bioinformatics*,  
534 **43**, 11.10.11-33.
- 535 31 Chang, C.C., Chow, C.C., Tellier, L.C., Vattikuti, S., Purcell, S.M. and Lee, J.J. (2015) Second-  
536 generation PLINK: rising to the challenge of larger and richer datasets. *GigaScience*, **4**, 7.
- 537 32 Purcell, S. and Chang, C., in press.
- 538 33 Schaid, D.J. (1996) General score tests for associations of genetic markers with disease using  
539 cases and their parents. *Genetic epidemiology*, **13**, 423-449.
- 540 34 Spielman, R.S., McGinnis, R.E. and Ewens, W.J. (1994) The transmission/disequilibrium test  
541 detects cosegregation and linkage. *American journal of human genetics*, **54**, 559-560; author reply 560-  
542 553.

- 543 35 Schwender, H., Li, Q., Neumann, C., Taub, M.A., Younkin, S.G., Berger, P., Scharpf, R.B.,  
544 Beaty, T.H. and Ruczinski, I. (2014) Detecting disease variants in case-parent trio studies using the  
545 bioconductor software package trio. *Genetic epidemiology*, **38**, 516-522.
- 546 36 Schwender, H., Taub, M.A., Beaty, T.H., Marazita, M.L. and Ruczinski, I. (2012) Rapid testing  
547 of SNPs and gene-environment interactions in case-parent trio data based on exact analytic parameter  
548 estimation. *Biometrics*, **68**, 766-773.
- 549 37 Laird, N.M. and Lange, C. (2008) Family-based methods for linkage and association analysis.  
550 *Advances in genetics*, **60**, 219-252.
- 551 38 Manichaikul, A., Mychaleckyj, J.C., Rich, S.S., Daly, K., Sale, M. and Chen, W.M. (2010)  
552 Robust relationship inference in genome-wide association studies. *Bioinformatics (Oxford, England)*,  
553 **26**, 2867-2873.
- 554 39 Kotlar, A.V., Trevino, C.E., Zwick, M.E., Cutler, D.J. and Wingo, T.S. (2018) Bystro: rapid  
555 online variant annotation and natural-language filtering at whole-genome scale. *Genome biology*, **19**, 14.
- 556 40 McLaren, W., Gil, L., Hunt, S.E., Riat, H.S., Ritchie, G.R., Thormann, A., Flicek, P. and  
557 Cunningham, F. (2016) The Ensembl Variant Effect Predictor. *Genome biology*, **17**, 122.
- 558 41 Ward, L.D. and Kellis, M. (2016) HaploReg v4: systematic mining of putative causal variants,  
559 cell types, regulators and target genes for human complex traits and disease. *Nucleic acids research*, **44**,  
560 D877-881.
- 561 42 Poon, H., Quirk, C., DeZiel, C. and Heckerman, D. (2014) Literome: PubMed-scale genomic  
562 knowledge base in the cloud. *Bioinformatics (Oxford, England)*, **30**, 2840-2842.
- 563 43 Browning, S.R. and Browning, B.L. (2007) Rapid and accurate haplotype phasing and missing-  
564 data inference for whole-genome association studies by use of localized haplotype clustering. *American*  
565 *journal of human genetics*, **81**, 1084-1097.
- 566 44 He, Z., O'Roak, B.J., Smith, J.D., Wang, G., Hooker, S., Santos-Cortez, R.L., Li, B., Kan, M.,  
567 Krumm, N., Nickerson, D.A. *et al.* (2014) Rare-variant extensions of the transmission disequilibrium  
568 test: application to autism exome sequence data. *American journal of human genetics*, **94**, 33-46.
- 569
